# Supplementary material
Source: Springer Nature journal article supplement (https://www.springermedizin.de/resource/supplementary/12889_2009_1869_MOESM1_ESM.pdf/9504246)
Supplement: MOESM1 [file 9504246]

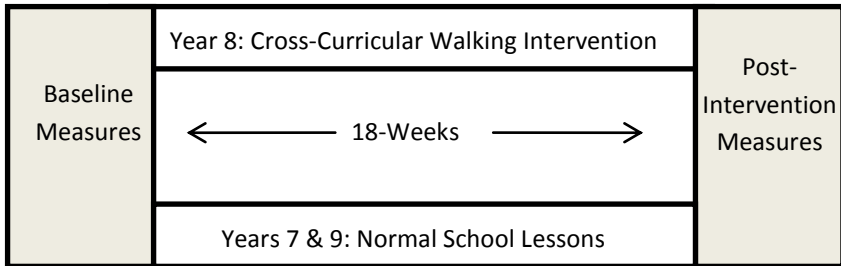

## Measurements

### **Anthropometrics**

Height.

Weight.

Waist, Hip, & Neck

Circumferences.

Biceps, Triceps, Suprailiac,  
& Subscapular Skinfolde.

### **Blood Pressure**

Systolic Blood Pressure.

Diastolic Blood Pressure.

### **Cardio-respiratory Fitness**

20 m Multi-stage Fitness Test.

### **Questionnaires**

Physical Activity Questionnaire  
for Adolescents.

Maturation Status .

Dietary Questionnaire.

### **Fasting Blood Variables**

Total Cholesterol.

High-density Lipoprotein Cholesterol.

Low-density Lipoprotein Cholesterol.

Triglycerides.

Insulin.

Glucose.

High-Sensitivity C-Reactive Protein.

Interleukin-6.

Fibrinogen.

Adiponectin.

### **Psychological Variables**

Motivation.

Well-being (Mood States).
